# Supplementary material for: Marine Organisms as a Prolific Source of Bioactive Depsipeptides
Source: MDPI journal article supplement (doi:10.3390/md21020120), 2023-02-11
Supplement: s1 [file s1]

# Marine organisms as a prolific source of bioactive depsipeptides

Mingyuan Zeng <sup>1</sup>, Jianyun Tao <sup>1</sup>, Shuang Xu <sup>1</sup>, Xuelian Bai <sup>2</sup> and Huawei Zhang <sup>1,\*</sup>

<sup>1</sup> School of Pharmaceutical Sciences, Zhejiang University of Technology, Hangzhou 310014, China

<sup>2</sup> College of Life and Environmental Sciences, Hangzhou Normal University, Hangzhou 311121, China

\* Correspondence: hwzhang@zjut.edu.cn

## Contents

|                                                                                              |     |
|----------------------------------------------------------------------------------------------|-----|
| Table S1 Detail information for marine cyanobacterium-derived depsipeptides ( <b>1-161</b> ) | S2  |
| Table S2 Detail information for marine sponge-derived depsipeptides ( <b>162-213</b> )       | S8  |
| Table S3 Detail information for marine mollusk-derived depsipeptides ( <b>214-243</b> )      | S10 |
| Table S4 Detail information for marine fungus-derived depsipeptides ( <b>244-259</b> )       | S11 |
| Table S5 Detail information for marine bacterium-derived depsipeptides ( <b>260-282</b> )    | S12 |
| Table S6. Detail information for marine algae-derived depsipeptides ( <b>283-288</b> ).      | S13 |
| References                                                                                   | S14 |

Table S1 Marine cyanobacterium-derived depsipeptides (1-161).

## 1. Linear lipopeptide

| Compound No. | Name            | Biological Source/ Strain No.       | Country/Region                                                 | Bioactivity                                                      | Ref. |
|--------------|-----------------|-------------------------------------|----------------------------------------------------------------|------------------------------------------------------------------|------|
| 1            | grassystatins D | <i>Symploca</i> VPG 14-61           | Cetti Bay, Guam                                                | potential antimetastatic activity against invasive breast cancer | [1]  |
| 2            | grassystatins E |                                     |                                                                |                                                                  |      |
| 3            | grassystatins F |                                     |                                                                |                                                                  |      |
| 4            | hoiamide C      | <i>Symploca</i> sp.                 | Gallows Reef, Papua New Guinea                                 | -                                                                | [2]  |
| 5            | hoiamide D      |                                     | near Kape Point, Papua New Guinea                              | inhibitor of p53/MDM2 interaction                                | [3]  |
| 6            | malevamides A   | <i>Symploca laeteviridis</i>        | south shore of Oahu, Hawaii                                    | -                                                                | [4]  |
| 7            | malevamide D    | <i>Symploca hydroides</i>           |                                                                | cytotoxic activity                                               | [5]  |
| 8            | symplostatin 3  | <i>Symploca</i> sp. VP452           | Kaneohe Bay, Oahu, Hawaii                                      | vitro cytotoxicity activity                                      | [6]  |
| 9            | symplostatin 4  | <i>Symploca</i> sp.                 | Key Largo (Florida Keys)                                       | antimalarial activity                                            | [7]  |
| 10           | tasiamide A     |                                     | Short Drop-off in Palau                                        | cytotoxic activity                                               | [8]  |
| 11           | tasiamide B     |                                     |                                                                |                                                                  |      |
| 12           | tasiamide C     |                                     |                                                                |                                                                  |      |
| 13           | tasiamide D     |                                     | Kimbe Bay off the north coast of New Britain, Papua New Guinea | -                                                                | [10] |
| 14           | tasiamide E     |                                     |                                                                | -                                                                |      |
| 15           | tasiamide F     | <i>Lyngbya</i> sp. NIH code 399     | Cocos Lagoon, Guam                                             | vivo inhibitor of cathepsins D and E                             | [11] |
| 16           | izenamide A     | <i>Lyngbya</i> 1605-5               | Izena Island, Okinawa Prefecture, Japan                        | -                                                                | [12] |
| 17           | izenamide B     |                                     |                                                                | -                                                                |      |
| 18           | izenamide C     |                                     |                                                                | -                                                                |      |
| 19           | grassystatin A  | <i>Lyngbya confervoides</i>         | Key Largo of Florida                                           | protease inhibitors activity                                     | [13] |
| 20           | grassystatin B  |                                     |                                                                |                                                                  |      |
| 21           | grassystatin C  |                                     |                                                                |                                                                  |      |
| 22           | maedamide       | <i>Lyngbya</i> sp.                  | Okinawa Prefecture                                             | chymotrypsin inhibitor                                           | [14] |
| 23           | lyngbyabellin D | <i>Lyngbya</i> sp VP417             | Finger's Reef, Apra Harbor, Guam                               | against the KB cell line.                                        | [15] |
| 24           | lyngbyabellin P | <i>Okeania</i> sp.                  | Red Sea                                                        | antifouling activity,                                            | [16] |
| 25           | gallinamide A   | <i>Schizothrix</i> sp               | North coast of Panama                                          | antimalarial and cytotoxic activity                              | [17] |
| 26           | veraguamide K   | <i>Oscillatoria margaritifera</i> . | shallow water off Isla Canales                                 | cytotoxic activity                                               | [18] |
| 27           | veraguamide L   |                                     | de Afuera on the Pacific coast of Panama                       |                                                                  |      |

## 2 Cyclodepsipeptides

## 2.1 Cyclopentadepsipeptides

| Compound No. | Name             | Biological Source/ Strain No.                       | Country/Region                             | Bioactivity                                  | Ref. |
|--------------|------------------|-----------------------------------------------------|--------------------------------------------|----------------------------------------------|------|
| 28           | benderamide A    | <i>Lyngbya</i> sp.                                  | shores of St. John's Island, Singapore     | -                                            | [19] |
| 29           | bouillomide A    | <i>Lyngbya bouillonii</i>                           | Guamanian                                  | inhibition of serine proteases activity      | [20] |
| 30           | bouillomide B    |                                                     |                                            |                                              |      |
| 31           | cocosamide A     | <i>Lyngbya majuscula</i>                            | Cocos Lagoon, Guam                         | weak cytotoxicity activity                   | [21] |
| 32           | cocosamide B     |                                                     | Papua New Guinea                           | cytotoxicity activity                        | [22] |
| 33           | guineamide C     |                                                     |                                            |                                              |      |
| 34           | kempopeptin A    | <i>Lyngbya</i> sp.                                  | Kemp Channel in the Florida Keys           | serine Protease Inhibitors activity          | [23] |
| 35           | kempopeptin B    |                                                     |                                            |                                              |      |
| 36           | kempopeptin C    |                                                     |                                            |                                              |      |
| 37           | kurahamide       | <i>Lyngbya conferWoides</i>                         | Kuraha, Okinawa Prefecture, Japan          | inhibited elastase and chymotrypsin activity | [25] |
| 38           | lyngbyastatin 4  |                                                     | Florida Atlantic coast                     | chymotrypsin inhibitor                       | [26] |
| 39           | lyngbyastatin 5  |                                                     |                                            |                                              |      |
| 40           | lyngbyastatin 6  | <i>Lyngbya</i> sp.                                  | coast of Fort Lauderdale, Florida          | selectively inhibit elastase                 | [27] |
| 41           | lyngbyastatin 7  |                                                     |                                            |                                              |      |
| 42           | lyngbyastatin 8  |                                                     |                                            |                                              |      |
| 43           | lyngbyastatin 9  | <i>Lyngbya semiplena</i>                            | Tumon Bay, Guam                            | inhibit porcine pancreatic elastase          | [28] |
| 44           | lyngbyastatin 10 |                                                     |                                            |                                              |      |
| 45           | pompanopeptin A  | <i>Lyngbya confervoides</i>                         | Near Fort Lauderdale, Florida, USA         | selectively inhibited trypsin                | [29] |
| 46           | somamide A       | <i>Lyngbya majuscula</i> and <i>Schizothrix</i> sp. | near Somo , Fiji, and Taveuni Island, Fiji | -                                            | [30] |
| 47           | somamide B       |                                                     |                                            | -                                            |      |
| 48           | yanucamide A     | <i>Lyngbya majuscula</i> and <i>Schizothrix</i> sp. | Yanuca Island, Fiji                        | Brine shrimp toxicity                        | [31] |
| 49           | yanucamide B     |                                                     |                                            |                                              |      |
| 50           | jizanpeptin A    | <i>Symploca</i> sp.                                 | Red Sea                                    | protease Inhibitors activity                 | [32] |
| 51           | jizanpeptin B    |                                                     |                                            |                                              |      |
| 52           | jizanpeptin C    |                                                     |                                            |                                              |      |
| 53           | jizanpeptin D    |                                                     |                                            |                                              |      |
| 54           | jizanpeptin E    |                                                     |                                            |                                              |      |
| 55           | symplostatin 2   | <i>Symploca hydroides</i>                           | Pago Bay, Guam                             | -                                            | [33] |
| 56           | symplostatin 5   | <i>Symploca</i> sp.                                 | Cetti Bay, Guam                            | elastase inhibitor activity                  | [34] |
| 57           | symplostatin 6   |                                                     |                                            | -                                            |      |
| 58           | symplostatin 7   |                                                     |                                            | -                                            |      |
| 59           | symplostatin 8   |                                                     |                                            | -                                            |      |
| 60           | symplostatin 9   |                                                     |                                            | -                                            |      |
| 61           | symplostatin 10  |                                                     |                                            | -                                            |      |
| 62           | trikoveramide A  | <i>Symploca hydroides</i>                           | Bintan Island, Indonesia                   | cytotoxic activity                           | [35] |

|    |                 |                                 |                                                                                           |                                 |      |
|----|-----------------|---------------------------------|-------------------------------------------------------------------------------------------|---------------------------------|------|
| 63 | trikoveramide B |                                 |                                                                                           |                                 |      |
| 64 | trikoveramide C |                                 |                                                                                           |                                 |      |
| 65 | kyanamide       | <i>Caldora penicillata</i>      | Kyan, Okinawa Prefecture, Japan                                                           | protease inhibitory activity    | [36] |
| 66 | largamides A    |                                 |                                                                                           | -                               |      |
| 67 | largamides B    |                                 |                                                                                           | -                               |      |
| 68 | largamides C    |                                 |                                                                                           | -                               |      |
| 69 | largamides D    | <i>Oscillatoria</i> sp.         | Keys off the coast of Key Largo (Florida, USA)                                            | inhibited chymotrypsin activity | [37] |
| 70 | largamides E    |                                 |                                                                                           |                                 |      |
| 71 | largamides F    |                                 |                                                                                           |                                 |      |
| 72 | largamides G    |                                 |                                                                                           |                                 |      |
| 73 | loggerpeptin A  |                                 |                                                                                           | -                               |      |
| 74 | loggerpeptin B  | <i>Leptolyngbya</i> sp.         | Loggerhead Key, Florida                                                                   | -                               | [38] |
| 75 | loggerpeptin C  |                                 |                                                                                           | protease Inhibition activity    |      |
| 76 | molassamide     | <i>Dichothrix utahensis</i>     | Molasses Reef, Key Largo, Florida, and from Brewer's Bay, St. Thomas, U.S. Virgin Islands | protease-inhibitory activity    | [39] |
| 77 | odoamide        | <i>Okeania</i> sp.              | Odo, Okinawa Prefecture, Japan                                                            | cytotoxic activity              | [40] |
| 78 | tutuilaide A    | -                               | American Samoa and Palmyra Atoll                                                          | elastase inhibitory activity    | [41] |
| 79 | tutuilaide B    | -                               |                                                                                           | elastase inhibitory activity    | [41] |
| 80 | tutuilaide C    | -                               |                                                                                           |                                 |      |
| 81 | unnarmicin D    | <i>Trichodesmium thiebautii</i> | Padre Island, Corpus Christi                                                              | -                               | [42] |

## 2.2 Cycohexadepsipeptides

| Compound No. | Name           | Biological Source/ Strain No. | Country/Region                             | Bioactivity        | Ref. |
|--------------|----------------|-------------------------------|--------------------------------------------|--------------------|------|
| 82           | antanapeptin A |                               |                                            | -                  |      |
| 83           | antanapeptin B |                               | Antany Mora, Madagascar                    | -                  | [43] |
| 84           | antanapeptin C |                               |                                            | -                  |      |
| 85           | antanapeptin D |                               |                                            | -                  |      |
| 86           | aurilides B    |                               |                                            | Cancer Cell Toxins | [44] |
| 87           | aurilides C    |                               |                                            |                    |      |
| 88           | guineamide D   | <i>Lyngbya majuscula</i>      | Papua New Guinea                           | -                  | [22] |
| 89           | guineamide F   |                               |                                            | -                  |      |
| 90           | palmyramide A  |                               | south of Strawn Island, Palmyra Atoll, USA | cytotoxic activity | [45] |
| 91           | trungapeptin A |                               | Thailand                                   | -                  | [46] |
| 92           | trungapeptin B |                               | Trung Province, Thailand                   | -                  | [46] |
| 93           | trungapeptin C |                               |                                            | -                  |      |
| 94           | veraguamide A  | <i>Symploca cf. hydnoides</i> | Cetti Bay, Guam                            | cytotoxic activity | [47] |

|     |               |                                   |                             |   |      |
|-----|---------------|-----------------------------------|-----------------------------|---|------|
| 95  | veraguamide B |                                   |                             |   |      |
| 96  | veraguamide C |                                   |                             |   |      |
| 97  | veraguamide D |                                   |                             |   |      |
| 98  | veraguamide E |                                   |                             |   |      |
| 99  | veraguamide F |                                   |                             |   |      |
| 100 | veraguamide G |                                   |                             |   |      |
| 101 | veraguamide H |                                   |                             | - |      |
| 102 | veraguamide I | <i>Oscillatoria margaritifera</i> | Coiba National Park, Panama | - | [18] |
| 103 | veraguamide J |                                   |                             | - |      |

1.2.3 Cycloheptadepsipeptides

| Compound No. | Name               | Biological Source/ Strain No. | Country/Region                                                              | Bioactivity                | Ref. |
|--------------|--------------------|-------------------------------|-----------------------------------------------------------------------------|----------------------------|------|
| 104          | guineamide E       | <i>Lyngbya majuscula</i>      | Papua New Guinea                                                            | -                          | [22] |
| 105          | lagunamide A       |                               |                                                                             |                            | [48] |
| 106          | lagunamide B       | <i>Lyngbya majuscula</i>      | Pulau Hantu, Singapore                                                      | cytotoxic activity         |      |
| 107          | lagunamide C       |                               | Pulau Hantu Besar Singapore                                                 |                            | [49] |
| 108          | lyngbyastatin 2    | <i>Lyngbya majuscula</i>      | Finger's Reef, Apra Harbor, Guam                                            | -                          | [50] |
| 109          | norlyngbyastatin 2 |                               |                                                                             | -                          |      |
| 110          | ulongapeptin       | <i>Lyngbya</i> sp             | Palauan                                                                     | cytotoxic activity         | [51] |
| 111          | coibamide A        | <i>Leptolyngbya</i> sp        | Coiba National Park, Panama                                                 | Antiproliferative activity | [52] |
| 112          | kohamamide A       |                               |                                                                             | -                          | [53] |
| 113          | kohamamide B       | <i>Okeania</i> sp             | Kohama Island, Okinawa Prefecture, Japan                                    | cytotoxicity activity      | [53] |
| 114          | kohamamide C       |                               |                                                                             | -                          |      |
| 115          | lagunamide D       | <i>Dichothrix</i> sp          | Loggerhead Key in the Dry Tortugas, Florida                                 | cytotoxic activity         | [54] |
| 116          | pemukainalide A    |                               |                                                                             | -                          |      |
| 117          | pemukainalide B    | <i>Symploca hydroides</i>     | Trikora beach, Bintan Island                                                | cytotoxic activity         | [55] |
| 118          | viequeamide A      |                               |                                                                             | cytotoxic activity         |      |
| 119          | viequeamide B      |                               |                                                                             | -                          |      |
| 120          | viequeamide C      |                               |                                                                             | -                          |      |
| 121          | viequeamide D      | <i>Rivularia</i> sp           | Playa de la Chiva on Vieques Island in the Commonwealth of Puerto Rico, USA | -                          | [56] |
| 122          | viequeamide E      |                               |                                                                             | -                          |      |
| 123          | viequeamide F      |                               |                                                                             | -                          |      |

1.2.4 Thiazole-containing Cycodipeptides

| Compound No. | Name              | Biological Source/ Strain No. | Country/Region           | Bioactivity           | Ref. |
|--------------|-------------------|-------------------------------|--------------------------|-----------------------|------|
| 124          | grassypeptolide A |                               |                          |                       |      |
| 125          | grassypeptolide B | <i>Lyngbya confervoides</i> . | Big Pine Shoals, Florida | Cytotoxicity activity | [57] |
| 126          | grassypeptolide C |                               |                          |                       |      |

| 127                            | grassyseptolide D         | <i>Leptolyngbya</i> sp                         | Red Sea                                   | -                                     | [58] |
|--------------------------------|---------------------------|------------------------------------------------|-------------------------------------------|---------------------------------------|------|
| 128                            | grassyseptolide E         |                                                |                                           |                                       |      |
| 129                            | grassyseptolide F         | <i>Lyngbya majuscula</i>                       | Ngerderrak Reef, Palau                    | -                                     | [59] |
| 130                            | grassyseptolide G         |                                                |                                           |                                       |      |
| 131                            | guineamide A              | <i>Lyngbya majuscula</i>                       | Papua New Guinea                          | -                                     | [22] |
| 132                            | guineamide B              |                                                |                                           | Cytotoxicity activity                 |      |
| 133                            | hoiamide A                | <i>Lyngbya majuscula</i>                       |                                           | Sodium Channel Activator              | [60] |
| 134                            | hoiamide B                |                                                |                                           |                                       |      |
| 135                            | lyngbyabellin A           | <i>Lyngbya majuscula</i>                       | Finger's Reef, Apra Harbor, Guam          | cytotoxic activity                    | [61] |
| 136                            | lyngbyabellin B           |                                                | Bush Key, Dry Tortugas, FL                | Antimicrobial activity                | [62] |
| 137                            | lyngbyabellin E           |                                                | Alotau Bay, Papua New Guinea              | cytotoxic activity                    | [63] |
| 138                            | lyngbyabellin H           |                                                |                                           |                                       |      |
| 139                            | lyngbyabellin G           |                                                |                                           |                                       |      |
| 140                            | 27-deoxylyngbyabellin A   | <i>Lyngbya bouillonii</i>                      | Apra Harbor, Guam                         | -                                     | [64] |
| 141                            | lyngbyabellin J           |                                                |                                           |                                       |      |
| 142                            | obyamide                  | <i>Lyngbya confervoides</i>                    | Obyan Bay in Saipan                       | cytotoxic activity                    | [65] |
| 1.2.5 Other Cyclodespipeptides |                           |                                                |                                           |                                       |      |
| Compound No.                   | Name                      | Biological Source/ Strain No.                  | Country/Region                            | Bioactivity                           | Ref. |
| 143                            | guineamide G              | <i>Lyngbya majuscula</i>                       | Papua New Guinea                          | cytotoxicity activity                 | [66] |
| 144                            | desmethoxymajusculamide C | <i>Lyngbya majuscula</i>                       | Yanuca Island, Fiji                       | cytotoxicity activity                 | [67] |
| 145                            | homodolastatin 16         |                                                | Wasini Island, Kenya                      | exhibited moderate activity           | [68] |
| 146                            | pitiprolamide             | <i>Lyngbya majuscula</i>                       | Piti Bomb Holes, Guam                     | cytotoxic activity                    | [69] |
| 147                            | lyngbyastatin 1           | <i>Lyngbya majuscula/Schizothrix calcicola</i> | Guam Piti Bomb Hole                       | cytotoxic activity                    | [70] |
| 148                            | lyngbyastatin 3           | <i>Lyngbya majuscula</i>                       | Tokai Maru shipwreck in Apra Harbor, Guam | -                                     | [71] |
| 149                            | wewakamide A              | <i>Lyngbya semiplena</i>                       | Papua New Guinea                          | brine shrimp toxicity                 | [66] |
| 150                            | wewakpeptin A             | <i>Lyngbya semiplena</i>                       | Papua New Guinea                          | cytotoxic activity                    | [72] |
| 151                            | wewakpeptin B             |                                                |                                           | cytotoxic activity                    |      |
| 152                            | wewakpeptin C             |                                                |                                           | -                                     |      |
| 153                            | wewakpeptin D             |                                                |                                           | -                                     |      |
| 154                            | malevamide B              |                                                |                                           | -                                     |      |
| 155                            | malevamide C              | <i>Symploca laete-viridis</i>                  | south shore of Oahu, Hawaii               | -                                     | [4]  |
| 156                            | malevamide E              |                                                | Oahu near Ala Moana Beach Park            | inhibitory effect on Ca <sup>2+</sup> |      |
| 157                            | triproamide               | <i>Symploca hydroides</i>                      | Trikora beach, Bintan Island              | -                                     | [55] |
| 158                            | companeramide A           | <i>Symploca</i>                                | Coiba Island, Panama                      | vitro antiplasmodial activity         | [74] |
| 159                            | companeramide B           |                                                |                                           |                                       |      |

|            |           |                                 |                      |                                         |      |
|------------|-----------|---------------------------------|----------------------|-----------------------------------------|------|
| <b>160</b> | hapalosin | <i>Hapalosiphon welwitschii</i> | -                    | multidrug-resistance reversing activity | [75] |
| <b>161</b> | urumamide | <i>Okeania</i> sp.              | Ikei Island, Okinawa | inhibitory activity                     | [76] |

Table S2 Detail information for marine sponge-derived depsipeptides (**162-213**).

| Compound No. | Name              | Biological Source/ Strain No.                                | Country/Region                                                                | Bioactivity                  | Ref. |
|--------------|-------------------|--------------------------------------------------------------|-------------------------------------------------------------------------------|------------------------------|------|
| 162          | callipeltin A     | <i>Callipelta</i> sp.                                        | New Caledonian Lithistida                                                     | Anti-HIV activity            | [77] |
| 163          | callipeltin L     | <i>Latrunculia</i> sp.                                       | Vanuatu South Pacific                                                         | -                            | [78] |
| 164          | callipeltin N     | <i>Asteropus</i> sp.                                         | Mary Island, Russell group, Solomon Islands                                   | cytotoxic activity           | [79] |
| 165          | callipeltin O     |                                                              |                                                                               |                              |      |
| 166          | cyclolithistide A | <i>Theonella swinhoei</i> .                                  | Jogashima, Sagami Bay, Japan                                                  | Antifungal activity          | [80] |
| 167          | daedophamide      | <i>Daedalopelta</i> sp.                                      | Alor Island (Indonesia)                                                       | cytotoxic activity           | [81] |
| 168          | gunungamide A     | <i>Discodermia</i> sp.                                       | Palau Gunung, Indonesia                                                       | -                            | [7]  |
| 169          | homophymine A     | <i>Homophymia</i> sp.                                        | east coast of New Caledonia                                                   | Anti-HIV activity            | [82] |
| 170          | homophymine A1    | <i>Homophymia</i> sp.                                        | New Caledonia                                                                 | antiproliferative activity   | [83] |
| 171          | homophymine B     |                                                              |                                                                               |                              |      |
| 172          | homophymine B2    |                                                              |                                                                               |                              |      |
| 173          | homophymine C     |                                                              |                                                                               |                              |      |
| 174          | homophymine C3    |                                                              |                                                                               |                              |      |
| 175          | homophymine D     |                                                              |                                                                               |                              |      |
| 176          | homophymine D4    |                                                              |                                                                               |                              |      |
| 177          | homophymine E     |                                                              |                                                                               |                              |      |
| 178          | homophymine E5    |                                                              |                                                                               |                              |      |
| 179          | microspinosamide  | <i>Sidonops microspinosa</i>                                 | near Sulawesi, Indonesia                                                      | Inhibited the cytopathic     | [84] |
| 180          | mirabamide A      | <i>Siliquariaspongia mirabilis</i>                           | Nama Island, southeast of Chuuk Lagoon, in the Federated States of Micronesia | Inhibit HIV-1 Fusion         | [85] |
| 181          | mirabamide B      |                                                              |                                                                               |                              |      |
| 182          | mirabamide C      |                                                              |                                                                               |                              |      |
| 183          | mirabamide D      |                                                              |                                                                               |                              |      |
| 184          | mirabamide E      | <i>Stelletta clavosa</i>                                     | Torres Strait.                                                                | Inhibit HIV-1 Fusion         | [86] |
| 185          | mirabamide F      |                                                              |                                                                               |                              |      |
| 186          | mirabamide G      |                                                              |                                                                               |                              |      |
| 187          | mirabamide H      |                                                              |                                                                               |                              |      |
| 188          | nagahamide A      | <i>Theonella swinhoei</i>                                    | southern Japan                                                                | Antibacterial activity       | [87] |
| 189          | papuamide A       | <i>Theonella mirabilis</i> and <i>T. swinhoei</i>            | near Madang Harbor on the north coast of Papua New Guinea                     | HIV-Inhibitory and Cytotoxic | [88] |
| 190          | papuamide B       |                                                              |                                                                               |                              |      |
| 191          | papuamide C       |                                                              |                                                                               |                              |      |
| 192          | papuamide D       |                                                              |                                                                               |                              |      |
| 193          | papuamide E       | <i>Melophlus</i> sp.                                         | Karumolum Russell Island in the Solomon Islands                               | cytotoxic activity           | [89] |
| 194          | papuamide F       |                                                              |                                                                               |                              |      |
| 195          | phoriospongin A   | <i>Phoriospongia</i> sp. and <i>Callyspongia bilamellata</i> | Indented Head                                                                 | Nematocidal activity         | [90] |



|            |                    |                             |                                                 |                                   |      |
|------------|--------------------|-----------------------------|-------------------------------------------------|-----------------------------------|------|
| <b>196</b> | phoriospongins B   |                             | Reef, Port Phillip Bay, Australia               |                                   |      |
| <b>197</b> | pipecolidepsin A   | <i>Homophymia lamellosa</i> | near Saint Marie Island, Madagascar             | cytotoxic activity                | [91] |
| <b>198</b> | pipecolidepsin B   |                             |                                                 |                                   |      |
| <b>199</b> | polydiscamide A    | <i>Discodermia</i> sp.      | St. Lucia, Lesser Antilles                      | Inhibition of cell proliferation  | [92] |
| <b>200</b> | polydiscamide B    | <i>Ircinia</i> sp.          | Porpoise Cay, the Great Barrier Reef, Australia | nonendogenous human SNSR agonists | [93] |
| <b>201</b> | polydiscamide C    |                             |                                                 |                                   |      |
| <b>202</b> | polydiscamide D    |                             |                                                 |                                   |      |
| <b>203</b> | stellatolide A     | <i>Ecionemia acervus</i>    |                                                 | Cytotoxic Activity                | [94] |
| <b>204</b> | stellatolide B     |                             |                                                 | Cytotoxic Activity                |      |
| <b>205</b> | stellatolide C     |                             |                                                 |                                   |      |
| <b>206</b> | stellatolide D     |                             |                                                 |                                   |      |
| <b>207</b> | stellatolide E     |                             |                                                 |                                   |      |
| <b>208</b> | stellatolide F     |                             |                                                 |                                   |      |
| <b>209</b> | stellatolide G     |                             |                                                 |                                   |      |
| <b>210</b> | stellatolide H     | <i>Discodermia</i> sp.      | East China Sea                                  | cytotoxic activity                | [95] |
| <b>211</b> | stellettapeptins A | <i>Stelletta</i> sp.        | northwestern Australia                          | HIV-inhibitory                    | [96] |
| <b>212</b> | stellettapeptins B |                             |                                                 |                                   |      |
| <b>213</b> | theopapuamide      | <i>Theonella swinhoei</i>   | Papua New Guinea                                | cytotoxic activity                | [97] |

Table S3 Detail information for marine mollusk-derived depsipeptides (214-243).

| Compound No. | Name                      | Biological Source/ Strain No. | Country/Region                         | Bioactivity               | Ref.  |
|--------------|---------------------------|-------------------------------|----------------------------------------|---------------------------|-------|
| 214          | aurilide A                | <i>Dolabella auricularia</i>  | Shima Peninsula, Mie Prefecture, Japan | cytotoxic activity        | [98]  |
| 215          | dolastatin D              |                               |                                        |                           | [99]  |
| 216          | dolastatin H              |                               |                                        |                           | [100] |
| 217          | isodolastatin H           |                               |                                        | cytotoxic activity        | [100] |
| 218          | dolastatin G              |                               |                                        |                           | [101] |
| 219          | nordolastatin G           |                               |                                        |                           |       |
| 220          | dolastatin 14             | <i>Elysia rufescens</i>       | Indian Ocean                           | cytotoxic activity        | [102] |
| 221          | kahalalide A              |                               | Black Point, O'ahu                     | -                         | [103] |
| 222          | kahalalide B              |                               |                                        | -                         |       |
| 223          | kahalalide C              |                               |                                        | -                         |       |
| 224          | kahalalide D              |                               |                                        | -                         |       |
| 225          | kahalalide E              |                               |                                        | -                         |       |
| 226          | kahalalide F              | <i>Elysia ornata</i>          |                                        | Against AIDS OI Pathogens | [104] |
| 227          | kahalalide O              |                               |                                        | -                         | [105] |
| 228          | kahalalide R              | <i>Elysia grandifolia</i>     | Malvan in the west coast of India      | -                         | [106] |
| 229          | kahalalide S              |                               |                                        | -                         |       |
| 230          | kahalalide Y              | <i>Elysia ornata</i>          | Kahala Bay near Black Point, Oahu      | -                         | [107] |
| 231          | kahalalide Z <sub>1</sub> |                               | coasts of Okha (India)                 |                           | [108] |
| 232          | kahalalide Z <sub>2</sub> |                               |                                        | antifungal activity       |       |
| 233          | kulokekahlide-1           | <i>Philinopsis speciosa</i>   | Shark's Cove, Pupukea, O'ahu           | cytotoxic activity        | [109] |
| 234          | kulokekahlide-2           |                               |                                        | -                         | [110] |
| 235          | kulolide-1                |                               |                                        |                           | [111] |
| 236          | kulolide-2                |                               |                                        | -                         |       |
| 237          | kulolide-3                |                               |                                        | -                         |       |
| 238          | kulokainallde-1           |                               |                                        | -                         |       |
| 239          | kulomo'opunalide- 1       |                               |                                        | -                         |       |
| 240          | kulomo'opunalide- 2       |                               |                                        | -                         |       |
| 241          | onchidin A                | <i>Onchidium</i> sp.          | New Caledonia                          | -                         | [112] |
| 242          | onchidin B                |                               |                                        | -                         | [113] |
| 243          | pupukeamide               | <i>Philinopsis</i> sp.        | Shark's Cove, Pupukea, O'ahu           | -                         | [114] |

Table S4. Detail information for marine fungus-derived depsipeptides (244-259).

| Compound No. | Name          | Biological Source/ Strain No.            | Country/Region                                 | Bioactivity            | Ref.  |
|--------------|---------------|------------------------------------------|------------------------------------------------|------------------------|-------|
| 244          | alternaramide | <i>Alternaria</i> sp. SF-5016            | Masan Bay area, Korea                          | antibiotic activity    | [115] |
| 245          | enniatin G    | <i>Halosarpheia</i> sp. 732              | South China Sea                                | inhibitory activity    | [116] |
| 246          | fusarihixin A | <i>Fusarium</i> sp. R5                   | Leizhou Peninsula, China                       | antifungal activity    | [117] |
| 247          | fusarihixin B |                                          |                                                |                        |       |
| 248          | guangomide A  | Sponge-derived fungus strain no. 001314c | Guango, Papua New Guinea                       | cytotoxic activity     | [118] |
| 249          | guangomide B  |                                          |                                                |                        |       |
| 250          | HA23          | <i>Fusarium</i> sp. (CANU-HA 23)         | -                                              | -                      | [119] |
| 251          | JBIR-113      | <i>Penicillium</i> sp. fS36              | Takarajima Island, Kagoshima Prefecture, Japan | -                      | [120] |
| 252          | JBIR-114      |                                          |                                                | -                      |       |
| 253          | JBIR-115      |                                          |                                                | -                      |       |
| 254          | sansalvamide  | <i>Fusarium</i> sp.                      | Little San Salvador Island, Bahamas            | cytotoxic activity     | [121] |
| 255          | W493 A        | <i>Fusarium</i> sp                       | Shizuoka city in Jpan                          | antibacterial activity | [122] |
| 256          | W493 B        |                                          |                                                |                        |       |
| 257          | W493 C        |                                          | Chinese Mangrove plant <i>Ceriops tagal</i>    | -                      | [123] |
| 258          | W493 D        |                                          |                                                | -                      |       |
| 259          | zygosporamide | <i>Zygosporium masonii</i>               | Maui, Hawaii                                   | cytotoxic activity     | [124] |

Table S5. Detail information for marine bacterium-derived depsipeptides (260-282).

| Compound No. | Name                    | Biological Source/ Strain No.                  | Country/Region                             | Bioactivity                                                   | Ref.  |
|--------------|-------------------------|------------------------------------------------|--------------------------------------------|---------------------------------------------------------------|-------|
| 260          | chromopeptide A         | <i>Chromobacterium</i> sp. HS-13-94            | East China Sea                             | cytotoxic activity                                            | [125] |
| 261          | rakicidin C             | <i>Streptomyces</i> sp (strain GT 61042)       | -                                          | -                                                             | [126] |
| 262          | rakicidin D             | <i>Streptomyces</i> sp. MWW064                 | Samut Sakhon province,Thailand             | inhibitor of tumor cell invasion                              | [127] |
| 263          | rakicidin F             | <i>Streptomyces</i> sp. GKU 220                | Andaman sea, Ranong, Thailand              | Antibacterial activity                                        | [128] |
| 264          | rakicidin G             | <i>Micromonospora chalcea</i> FIM 02-523       | -                                          | cytotoxic activity                                            | [129] |
| 265          | rakicidin H             |                                                | -                                          |                                                               |       |
| 266          | rakicidin I             |                                                | -                                          |                                                               |       |
| 267          | salinamide A            |                                                |                                            |                                                               |       |
| 268          | salinamide B            | <i>Streptomyces</i> sp. CNB-091                | Florida Keys                               | antibiotic activity                                           | [130] |
| 269          | salinamide F            |                                                |                                            | Antibiotic and inhibitor of bacterial RNA polymerase activity | [131] |
| 270          | sameuramide A           | <i>Chromobacterum</i> sp. QS3666.              | Sameura bay, Miyagi prefecture, Japan      | -                                                             | [132] |
| 271          | streptopeptolin A       | <i>Streptomyces olivochromogenes</i> NBRC 3561 | Japan                                      | inhibitory activity against chymotrypsin                      | [133] |
| 272          | streptopeptolin B       |                                                |                                            | chymotrypsin inhibitory                                       | [134] |
| 273          | streptopeptolin C       |                                                |                                            | -                                                             | [134] |
| 274          | thiocoraline            | <i>Micromonospora</i> sp L-13-ACM2-092         | Indian Ocean near the coast of Mozambique. | Antitumor activity                                            | [135] |
| 275          | thiochondrilline A      | <i>Verrucosispora</i> sp.                      | Florida Keys                               | -                                                             | [136] |
| 276          | thiochondrilline B      |                                                |                                            | -                                                             |       |
| 277          | thiochondrilline C      |                                                |                                            |                                                               |       |
| 278          | 22'-deoxythiocoraline   |                                                |                                            | cytotoxic activity                                            |       |
| 279          | 12'-sulfoxythiocoraline | <i>Photobacterium</i> sp. MBIC06485            | Onna Beach, Okinawa, Japan                 | Antibacterial activity                                        | [137] |
| 280          | unnarmicin A            |                                                |                                            |                                                               |       |
| 281          | unnarmicin C            |                                                |                                            |                                                               |       |
| 282          | verrucosamide           | <i>Verrucosispora</i> sp. CNX-026              | Central West Coast of Florida              | cytotoxic activity                                            | [138] |

Table S6. Detail information for marine algae-derived depsipeptides (**283-288**).

| Compound No. | Name         | Biological Source/ Strain No. | Country/Region                 | Bioactivity                                               | Ref.  |
|--------------|--------------|-------------------------------|--------------------------------|-----------------------------------------------------------|-------|
| <b>283</b>   | kahalalide K | <i>Bryopsis</i> sp.           | Wai'ananae Boat Harbor, Hawaii | -                                                         | [139] |
| <b>284</b>   | kahalalide P |                               |                                | -                                                         | [140] |
| <b>285</b>   | kahalalide Q |                               |                                | -                                                         |       |
| <b>286</b>   | mebamamide A | <i>Derbesia marina</i>        | Mebama, Mie, Japan             | induced the differentiation of HL60 cells into macrophage | [141] |
| <b>287</b>   | mebamamide B |                               |                                |                                                           |       |
| <b>288</b>   | pagoamide A  | <i>Derbesia</i> sp.           | Fagatele Bay, American Samoa   | -                                                         | [142] |

## Reference

1. Al-Awadhi, F.H.; Law, B.K.; Paul, V.J.; Luesch, H. Grassystatins D-F, potent aspartic protease inhibitors from marine cyanobacteria as potential antimetastatic agents targeting invasive breast cancer. *J. Nat. Prod.* **2017**, *80*, 2969-2986, doi:10.1021/acs.jnatprod.7b00551.
2. Choi, H.; Pereira, A.R.; Cao, Z.; Shuman, C.F.; Engene, N.; Byrum, T.; Matainaho, T.; Murray, T.F.; Mangoni, A.; Gerwick, W.H. The hoiamides, structurally intriguing neurotoxic lipopeptides from Papua New Guinea marine cyanobacteria. *J. Nat. Prod.* **2010**, *73*, 1411-1421, doi:10.1021/np100468n.
3. Malloy, K.L.; Choi, H.; Fiorilla, C.; Valeriote, F.A.; Matainaho, T.; Gerwick, W.H. Hoiamide D, a marine cyanobacteria-derived inhibitor of p53/MDM2 interaction. *Bioorg. Med. Chem. Lett.* **2012**, *22*, 683-688, doi:10.1016/j.bmcl.2011.10.054.
4. Horgen, F.D.; Yoshida, W.Y.; Scheuer, P.J. Malevamides A-C, new depsipeptides from the marine cyanobacterium *Symploca laete-viridis*. *J. Nat. Prod.* **2000**, *63*, 461-467, doi:10.1021/np990449+.
5. Horgen, F.D.; Kazmierski, E.B.; Westenburg, H.E.; Yoshida, W.Y.; Scheuer, P.J. Malevamide D: isolation and structure determination of an isodolastatin H analogue from the marine cyanobacterium *Symploca hydroides*. *J. Nat. Prod.* **2002**, *65*, 487-491, doi:10.1021/np010560r.
6. Luesch, H.; Yoshida, W.Y.; Moore, R.E.; Paul, V.J.; Mooberry, S.L.; Corbett, T.H. Symplostatin 3, a new dolastatin 10 analogue from the marine cyanobacterium *Symploca* sp. VP452. *J. Nat. Prod.* **2002**, *65*, 16-20, doi:10.1021/np010317s.
7. Tarazona, G.; Fernández, R.; Cruz, P.G.; Pérez, M.; Rodríguez, J.; Jiménez, C.; Cuevas, C. Combining JBCA and Marfey's methodology to determine the absolute configuration of threonines: the case of gunungamide A, a new cyclic depsipeptide containing chloropyrrole from the sponge *Discodermia* sp. *Org. Chem. Front* **2019**, *6*, 15-21, doi:10.1039/c8qo00961a.
8. Williams, P.G.; Yoshida, W.Y.; Moore, R.E.; Paul, V.J. Tasiamide, a cytotoxic peptide from the marine cyanobacterium *Symploca* sp. *J. Nat. Prod.* **2002**, *65*, 1336-1339, doi:10.1021/np020184q.
9. Williams, P.G.; Yoshida, W.Y.; Moore, R.E.; Paul, V.J. The isolation and structure elucidation of Tasiamide B, a 4-amino-3-hydroxy-5-phenylpentanoic acid containing peptide from the marine cyanobacterium *Symploca* sp. *J. Nat. Prod.* **2003**, *66*, 1006-1009, doi:10.1021/np030114z.
10. Mevers, E.; Haeckl, F.P.; Boudreau, P.D.; Byrum, T.; Dorrestein, P.C.; Valeriote, F.A.; Gerwick, W.H. Lipopeptides from the tropical marine cyanobacterium *Symploca* sp. *J. Nat. Prod.* **2014**, *77*, 969-975, doi:10.1021/np401051z.
11. Al-Awadhi, F.H.; Ratnayake, R.; Paul, V.J.; Luesch, H. Tasiamide F, a potent inhibitor of cathepsins D and E from a marine cyanobacterium. *Bioorgan. Med. Chem.* **2016**, *24*, 3276-3282, doi:10.1016/j.bmc.2016.04.062.
12. Kanamori, Y.; Iwasaki, A.; Sumimoto, S.; Matsubara, T.; Sato, T.; Suenaga, K. Izenamides A and B, statine-containing depsipeptides, and an analogue from a marine

- cyanobacterium. *J. Nat. Prod.* **2018**, *81*, 1673-1681, doi:10.1021/acs.jnatprod.8b00417.
13. Kwan, J.C.; Eksioglu, E.A.; Liu, C.; Paul, V.J.; Luesch, H. Grassystatins A-C from marine cyanobacteria, potent cathepsin E inhibitors that reduce antigen presentation. *J. Med. Chem.* **2009**, *52*, 5732-5747, doi:10.1021/jm9009394.
  14. Iwasaki, A.; Ohno, O.; Sumimoto, S.; Suda, S.; Suenaga, K. Maedamide, a novel chymotrypsin inhibitor from a marine cyanobacterial assemblage of *Lyngbya* sp. *Tetrahedron Lett.* **2014**, *55*, 4126-4128, doi:10.1016/j.tetlet.2014.05.099.
  15. Williams, P.G.; Luesch, H.; Yoshida, W.Y.; Moore, R.E.; Paul, V.J. Continuing studies on the cyanobacterium *Lyngbya* sp.: isolation and structure determination of 15-norlyngbyapeptin A and lyngbyabellin D. *J. Nat. Prod.* **2003**, *66*, 595-598, doi:10.1021/np030011g.
  16. Petitbois, J.G.; Casalme, L.O.; Lopez, J.A.V.; Alarif, W.M.; Abdel-Lateff, A.; Al-Lihaibi, S.S.; Yoshimura, E.; Nogata, Y.; Umezawa, T.; Matsuda, F.; et al. Serinolamides and Lyngbyabellins from an *Okeania* sp. Cyanobacterium Collected from the Red Sea. *J. Nat. Prod.* **2017**, *80*, 2708-2715, doi:10.1021/acs.jnatprod.7b00449.
  17. Linington, R.G.; Clark, B.R.; Trimble, E.E.; Almanza, A.; Ureña, L.D.; Kyle, D.E.; Gerwick, W.H. Antimalarial peptides from marine cyanobacteria: isolation and structural elucidation of gallinamide A. *J. Nat. Prod.* **2009**, *72*, 14-17, doi:10.1021/np8003529.
  18. Mevers, E.; Liu, W.-T.; Engene, N.; Mohimani, H.; Byrum, T.; Pevzner, P.A.; Dorrestein, P.C.; Spadafora, C.; Gerwick, W.H. Cytotoxic veraguamides, alkynyl bromide-containing cyclic depsipeptides from the marine cyanobacterium cf. *Oscillatoria margaritifera*. *J. Nat. Prod.* **2011**, *74*, 928-936, doi:10.1021/np200077f.
  19. Ding, C.Y.G.; Ong, J.F.M.; Goh, H.C.; Coffill, C.R.; Tan, L.T. Benderamide A, a cyclic depsipeptide from a singapore collection of marine cyanobacterium cf. *Lyngbya* sp. *Mar. Drugs* **2018**, *16*, 409, doi:10.3390/md16110409.
  20. Rubio, B.K.; Parrish, S.M.; Yoshida, W.; Schupp, P.J.; Schils, T.; Williams, P.G. Depsipeptides from a guamanian marine cyanobacterium, *Lyngbya bouillonii*, with selective inhibition of serine proteases. *Tetrahedron Lett.* **2010**, *51*, 6718-6721, doi:10.1016/j.tetlet.2010.10.062.
  21. Gunasekera, S.P.; Owle, C.S.; Montaser, R.; Luesch, H.; Paul, V.J. Malyngamide 3 and cocosamides A and B from the marine cyanobacterium *Lyngbya majuscula* from cocos lagoon, guam. *J. Nat. Prod.* **2011**, *74*, 871-876, doi:10.1021/np1008015.
  22. Tan, L.T.; Sitachitta, N.; Gerwick, W.H. The guineamides, novel cyclic depsipeptides from a papua new guinea collection of the marine cyanobacterium *Lyngbya majuscula*. *J. Nat. Prod.* **2003**, *66*, 764-771, doi:10.1021/np020492o.
  23. Taori, K.; Paul, V.J.; Luesch, H. Kempopeptins A and B, serine protease inhibitors with different selectivity profiles from a marine cyanobacterium, *Lyngbya* sp. *J. Nat. Prod.* **2008**, *71*, 1625-1629, doi:10.1021/np8002172.
  24. Al-Awadhi, F.H.; Salvador, L.A.; Law, B.K.; Paul, V.J.; Luesch, H. Kempopeptin C, a novel marine-derived serine protease inhibitor targeting invasive breast cancer. *Mar. Drugs* **2017**, *15*, 290, doi:10.3390/md15090290.
  25. Iwasaki, A.; Sumimoto, S.; Ohno, O.; Suda, S.; Suenaga, K. Kurahamide, a cyclic depsipeptide analog of dolastatin 13 from a marine cyanobacterial assemblage of

*Lyngbya* sp. *Bull. Chem. Soc. Jpn.* **2014**, *87*, 609-613, doi:10.1246/bcsj.20140008.

26. Matthew, S.; Ross, C.; Rocca, J.R.; Paul, V.J.; Luesch, H. Lyngbyastatin 4, a dolastatin 13 analogue with elastase and chymotrypsin inhibitory activity from the marine cyanobacterium *Lyngbya confervoides*. *J. Nat. Prod.* **2007**, *70*, 124-127, doi:10.1021/np060471k.
27. Taori, K.; Matthew, S.; Rocca, J.R.; Paul, V.J.; Luesch, H. Lyngbyastatins 5-7, potent elastase inhibitors from floridian marine cyanobacteria, *Lyngbya* spp. *J. Nat. Prod.* **2007**, *70*, 1593-1600, doi:10.1021/np0702436.
28. Kwan, J.C.; Taori, K.; Paul, V.J.; Luesch, H. Lyngbyastatins 8-10, elastase inhibitors with cyclic depsipeptide scaffolds isolated from the marine cyanobacterium *Lyngbya semiplena*. *Mar. Drugs* **2009**, *7*, 528-538, doi:10.3390/md7040528.
29. Matthew, S.; Ross, C.; Paul, V.J.; Luesch, H. Pompanopeptins A and B, new cyclic peptides from the marine cyanobacterium *Lyngbya confervoides*. *Tetrahedron* **2008**, *64*, 4081-4089, doi:10.1016/j.tet.2008.02.035.
30. Nogle, L.M.; Williamson, R.T.; Gerwick, W.H. Somamides A and B, two new depsipeptide analogues of dolastatin 13 from a Fijian cyanobacterial assemblage of *Lyngbya majuscula* and *Schizothrix* species. *J. Nat. Prod.* **2001**, *64*, 716-719, doi:10.1021/np000634j.
31. Sitachitta, N.; Williamson, R.T.; Gerwick, W.H. Yanucamides A and B, two new depsipeptides from an assemblage of the marine cyanobacteria *Lyngbya majuscula* and *Schizothrix* species. *J. Nat. Prod.* **2000**, *63*, 197-200, doi:10.1021/np990466z.
32. Gallegos, D.A.; Sauri, J.; Cohen, R.D.; Wan, X.; Videau, P.; Vallota-Eastman, A.O.; Shaala, L.A.; Youssef, D.T.A.; Williamson, R.T.; Martin, G.E.; et al. Jizanpeptins, cyanobacterial protease inhibitors from a *Symploca* sp. cyanobacterium collected in the red sea. *J. Nat. Prod.* **2018**, *81*, 1417-1425, doi:10.1021/acs.jnatprod.8b00117.
33. Harrigan, G.G.; Luesch, H.; Yoshida, W.Y.; Moore, R.E.; Nagle, D.G.; Paul, V.J. Symplostatin 2: a dolastatin 13 analogue from the marine cyanobacterium *Symploca hydroides*. *J. Nat. Prod.* **1999**, *62*, 655-658, doi:10.1021/np980553b.
34. Salvador, L.A.; Taori, K.; Biggs, J.S.; Jakoncic, J.; Ostrov, D.A.; Paul, V.J.; Luesch, H. Potent elastase inhibitors from cyanobacteria: structural basis and mechanisms mediating cytoprotective and anti-inflammatory effects in bronchial epithelial cells. *J. Med. Chem.* **2013**, *56*, 1276-1290, doi:10.1021/jm3017305.
35. Phyto, M.Y.; Katermeran, N.P.; Goh, J.X.; Tan, L.T. Trikoverylamides A-C, cyclic depsipeptides from the marine cyanobacterium *Symploca hydroides*. *Phytochemistry* **2021**, *190*, 112879, doi:10.1016/j.phytochem.2021.112879.
36. Ozaki, K.; Iwasaki, A.; Suenaga, K.; Teruya, T. Kyanamide, a new Ahp-containing depsipeptide from marine cyanobacterium *Caldora penicillata*. *Tetrahedron* **2019**, *75*, 3382-3386, doi:10.1016/j.tet.2019.04.046.
37. Plaza, A.; Bewley, C.A. Largamides A-H, unusual cyclic peptides from the marine cyanobacterium *Oscillatoria* sp. *J. Org. Chem.* **2006**, *71*, 6898-6907, doi:10.1021/jo061044e.



38. Al-Awadhi, F.H.; Paul, V.J.; Luesch, H. Structural diversity and anticancer activity of marine-derived elastase inhibitors: Key features and mechanisms mediating the antimetastatic effects in invasive breast cancer. *Chembiochem* **2018**, *19*, 815-825, doi:10.1002/cbic.201700627.
39. Gunasekera, S.P.; Miller, M.W.; Kwan, J.C.; Luesch, H.; Paul, V.J. Molassamide, a depsipeptide serine protease inhibitor from the marine cyanobacterium *Dichothrix utahensis*. *J. Nat. Prod.* **2010**, *73*, 459-462, doi:10.1021/np900603f.
40. Sueyoshi, K.; Kaneda, M.; Sumimoto, S.; Oishi, S.; Fujii, N.; Suenaga, K.; Teruya, T. Odoamide, a cytotoxic cyclodepsipeptide from the marine cyanobacterium *Okeania* sp. *Tetrahedron* **2016**, *72*, 5472-5478, doi:10.1016/j.tet.2016.07.031.
41. Keller, L.; Canuto, K.M.; Liu, C.; Suzuki, B.M.; Almaliti, J.; Sikandar, A.; Naman, C.B.; Glukhov, E.; Luo, D.; Duggan, B.M.; et al. Tutuilamides A-C: vinyl-chloride-containing cyclodepsipeptides from marine cyanobacteria with potent elastase inhibitory properties. *ACS Chem. Biol.* **2020**, *15*, 751-757, doi:10.1021/acscchembio.9b00992.
42. Bertin, M.J.; Roduit, A.F.; Sun, J.; Alves, G.E.; Via, C.W.; Gonzalez, M.A.; Zimba, P.V.; Moeller, P.D.R. Tricholides A and B and Unnarmicin D: new hybrid PKS-NRPS macrocycles isolated from an environmental collection of *Trichodesmium thiebautii*. *Mar. Drugs* **2017**, *15*, 206, doi:10.3390/md15070206.
43. Nogle, L.M.; Gerwick, W.H. Isolation of four new cyclic depsipeptides, antanapeptins A-D, and dolastatin 16 from a Madagascan collection of *Lyngbya majuscula*. *J. Nat. Prod.* **2002**, *65*, 21-24, doi:10.1021/np010348n.
44. Han, B.; Gross, H.; Goeger, D.E.; Mooberry, S.L.; Gerwick, W.H. Aurilides B and C, cancer cell toxins from a papua new guinea collection of the marine cyanobacterium *Lyngbya majuscula*. *J. Nat. Prod.* **2006**, *69*, 572-575, doi:10.1021/np0503911.
45. Taniguchi, M.; Nunnery, J.K.; Engene, N.; Esquenazi, E.; Byrum, T.; Dorrestein, P.C.; Gerwick, W.H. Palmyramide A, a cyclic depsipeptide from a Palmyra Atoll collection of the marine cyanobacterium *Lyngbya majuscula*. *J. Nat. Prod.* **2010**, *73*, 393-398, doi:10.1021/np900428h.
46. Bunyajetpong, S.; Yoshida, W.Y.; Sitachitta, N.; Kaya, K. Trungapeptins A-C, cyclodepsipeptides from the marine cyanobacterium *Lyngbya majuscula*. *J. Nat. Prod.* **2006**, *69*, 1539-1542, doi:10.1021/np050485a.
47. Salvador, L.A.; Biggs, J.S.; Paul, V.J.; Luesch, H. Veraguamides A-G, cyclic hexadepsipeptides from a dolastatin 16-producing cyanobacterium *Symploca* cf. *hydroides* from Guam. *J. Nat. Prod.* **2011**, *74*, 917-927, doi:10.1021/np200076t.
48. Tripathi, A.; Puddick, J.; Prinsep, M.R.; Rottmann, M.; Tan, L.T. Lagunamides A and B: cytotoxic and antimalarial cyclodepsipeptides from the marine cyanobacterium *Lyngbya majuscula*. *J. Nat. Prod.* **2010**, *73*, 1810-1814, doi:10.1021/np100442x.
49. Tripathi, A.; Puddick, J.; Prinsep, M.R.; Rottmann, M.; Chan, K.P.; Chen, D.Y.-K.; Tan, L.T. Lagunamide C, a cytotoxic cyclodepsipeptide from the marine cyanobacterium *Lyngbya majuscula*. *Phytochemistry* **2011**, *72*, 2369-2375, doi:10.1016/j.phytochem.2011.08.019.
50. Luesch, H.; Yoshida, W.Y.; Moore, R.E.; Paul, V.J. Lyngbyastatin 2 and norlyngbyastatin 2, analogues of dolastatin G and nordolastatin G from the marine

cyanobacterium *Lyngbya majuscula*. *J. Nat. Prod.* **1999**, *62*, 1702-1706, doi:10.1021/np990310z.

51. Williams, P.G.; Yoshida, W.Y.; Quon, M.K.; Moore, R.E.; Paul, V.J. Ulongapeptin, a cytotoxic cyclic depsipeptide from a Palauan marine cyanobacterium *Lyngbya* sp. *J. Nat. Prod.* **2003**, *66*, 651-654, doi:10.1021/np030050s.
52. Medina, R.A.; Goeger, D.E.; Hills, P.; Mooberry, S.L.; Huang, N.; Romero, L.I.; Ortega-Barria, E.; Gerwick, W.H.; McPhail, K.L. Coibamide A, a potent antiproliferative cyclic depsipeptide from the Panamanian marine cyanobacterium *Leptolyngbya* sp. *J. Am. Chem. Soc.* **2008**, *130*, 6324-6325, doi:10.1021/ja801383f.
53. Iwasaki, A.; Shiota, I.; Sumimoto, S.; Matsubara, T.; Sato, T.; Suenaga, K. Kohamamides A, B, and C, cyclic depsipeptides from an *Okeania* sp. marine cyanobacterium. *J. Nat. Prod.* **2017**, *80*, 1948-1952, doi:10.1021/acs.jnatprod.7b00256.
54. Luo, D.; Putra, M.Y.; Ye, T.; Paul, V.J.; Luesch, H. Isolation, structure elucidation and biological evaluation of Lagunamide D: a new cytotoxic macrocyclic depsipeptide from marine cyanobacteria. *Mar. Drugs* **2019**, *17*, 83, doi:10.3390/md17020083.
55. Phyto, M.Y.; Goh, J.X.; Tan, L.T. Triproamide and Pemukainalides, cyclic depsipeptides from the marine cyanobacterium *Symploca hydroides*. *J. Nat. Prod.* **2022**, *85*, 485-492, doi:10.1021/acs.jnatprod.1c00996.
56. Boudreau, P.D.; Byrum, T.; Liu, W.T.; Dorrestein, P.C.; Gerwick, W.H. Viequeamide A, a cytotoxic member of the kulolide superfamily of cyclic depsipeptides from a marine button cyanobacterium. *J. Nat. Prod.* **2012**, *75*, 1560-1570, doi:10.1021/np300321b.
57. Kwan, J.C.; Ratnayake, R.; Abboud, K.A.; Paul, V.J.; Luesch, H. Grassypeptolides A-C, cytotoxic bis-thiazoline containing marine cyclodepsipeptides. *J. Org. Chem.* **2010**, *75*, 8012-8023, doi:10.1021/jo1013564.
58. Thornburg, C.C.; Thimmaiah, M.; Shaala, L.A.; Hau, A.M.; Malmo, J.M.; Ishmael, J.E.; Youssef, D.T.; McPhail, K.L. Cyclic depsipeptides, grassypeptolides D and E and Ibu-epidemethoxylyngbyastatin 3, from a Red Sea *Leptolyngbya* cyanobacterium. *J. Nat. Prod.* **2011**, *74*, 1677-1685, doi:10.1021/np200270d.
59. Popplewell, W.L.; Ratnayake, R.; Wilson, J.A.; Beutler, J.A.; Colburn, N.H.; Henrich, C.J.; McMahon, J.B.; McKee, T.C. Grassypeptolides F and G, cyanobacterial peptides from *Lyngbya majuscula*. *J. Nat. Prod.* **2011**, *74*, 1686-1691, doi:10.1021/np2005083.
60. Pereira, A.; Cao, Z.; Murray, T.F.; Gerwick, W.H. Hoiamide a, a sodium channel activator of unusual architecture from a consortium of two papua new Guinea cyanobacteria. *Chem. Biol.* **2009**, *16*, 893-906, doi:10.1016/j.chembiol.2009.06.012.
61. Luesch, H.; Yoshida, W.Y.; Moore, R.E.; Paul, V.J.; Mooberry, S.L. Isolation, structure determination, and biological activity of Lyngbyabellin A from the marine cyanobacterium *lyngbya majuscula*. *J. Nat. Prod.* **2000**, *63*, 611-615, doi:10.1021/np990543q.
62. Milligan, K.E.; Marquez, B.L.; Williamson, R.T.; Gerwick, W.H. Lyngbyabellin B, a toxic and antifungal secondary metabolite from the marine cyanobacterium *Lyngbya majuscula*. *J. Nat. Prod.* **2000**, *63*, 1440-1443, doi:10.1021/np000133y.
63. Han, B.; McPhail, K.L.; Gross, H.; Goeger, D.E.; Mooberry, S.L.; Gerwick, W.H. Isolation and structure of five lyngbyabellin derivatives from a papua new guinea

collection of the marine cyanobacterium *Lyngbya majuscula*. *Tetrahedron* **2005**, *61*, 11723-11729, doi:10.1016/j.tet.2005.09.036.

64. Matthew, S.; Salvador, L.A.; Schupp, P.J.; Paul, V.J.; Luesch, H. Cytotoxic halogenated macrolides and modified peptides from the apratoxin-producing marine cyanobacterium *Lyngbya bouillonii* from Guam. *J. Nat. Prod.* **2010**, *73*, 1544-1552, doi:10.1021/np1004032.
65. Williams, P.G.; Yoshida, W.Y.; Moore, R.E.; Paul, V.J. Isolation and structure determination of obyanamide, a novel cytotoxic cyclic depsipeptide from the marine cyanobacterium *Lyngbya confervoides*. *J. Nat. Prod.* **2002**, *65*, 29-31, doi:10.1021/np0102253.
66. Han, B.; Gross, H.; McPhail, K.L.; Goeger, D.; Maier, C.S.; Gerwick, W.H. Wewakamide A and guineamide G, cyclic depsipeptides from the marine cyanobacteria *Lyngbya semiplena* and *Lyngbya majuscula*. *J. Mic.Biote.* **2011**, *21*, 930-936, doi:10.4014/jmb.1105.05011.
67. Simmons, T.L.; Nogle, L.M.; Media, J.; Valeriote, F.A.; Mooberry, S.L.; Gerwick, W.H. Desmethoxymajusculamide C, a cyanobacterial depsipeptide with potent cytotoxicity in both cyclic and ring-opened forms. *J. Nat. Prod.* **2009**, *72*, 1011-1016, doi:10.1021/np9001674.
68. Davies-Coleman, M.T.; Dzeha, T.M.; Gray, C.A.; Hess, S.; Pannell, L.K.; Hendricks, D.T.; Arendse, C.E. Isolation of homodolastatin 16, a new cyclic depsipeptide from a kenyan collection of *Lyngbya majuscula*. *J. Nat. Prod.* **2003**, *66*, 712-715, doi:10.1021/np030014t.
69. Montaser, R.; Abboud, K.A.; Paul, V.J.; Luesch, H. Pitiprolamide, a proline-rich dolastatin 16 analogue from the marine cyanobacterium *Lyngbya majuscula* from Guam. *J. Nat. Prod.* **2011**, *74*, 109-112, doi:10.1021/np1006839.
70. Harrigan, G.G.; Yoshida, W.Y.; Moore, R.E.; Nagle, D.G.; Park, P.U.; Biggs, J.; Paul, V.J.; Mooberry, S.L.; Corbett, T.H.; Valeriote, F.A. Isolation, structure determination, and biological activity of dolastatin 12 and lyngbyastatin 1 from *Lyngbya majuscula*/*Schizothrix calcicola* cyanobacterial assemblages. *J. Nat. Prod.* **1998**, *61*, 1221-1225, doi:10.1021/np9801211.
71. Williams, P.G.; Moore, R.E.; Paul, V.J. Isolation and structure determination of lyngbyastatin 3, a lyngbyastatin 1 homologue from the marine cyanobacterium *Lyngbya majuscula*. Determination of the configuration of the 4-amino-2,2-dimethyl-3-oxopentanoic acid unit in majusculamide C, dolastatin 12, lyngbyastatin 1, and lyngbyastatin 3 from cyanobacteria. *J. Nat. Prod.* **2003**, *66*, 1356-1363, doi:10.1021/np0302145.
72. Han, B.; Goeger, D.; Maier, C.S.; Gerwick, W.H. The wewakpeptins, cyclic depsipeptides from a papua new guinea collection of the marine cyanobacterium *Lyngbya semiplena*. *J. Org. Chem.* **2005**, *70*, 3133-3139, doi:10.1021/jo0478858.
73. Adams, B.; Porzgen, P.; Pittman, E.; Yoshida, W.Y.; Westenburg, H.E.; Horgen, F.D. Isolation and structure determination of malevamide E, a dolastatin 14 analogue, from the marine cyanobacterium *symploca laete-viridis*. *J. Nat. Prod.* **2008**, *71*, 750-754, doi:10.1021/np070346o.
74. Vining, O.B.; Medina, R.A.; Mitchell, E.A.; Videau, P.; Li, D.; Serrill, J.D.; Kelly, J.X.; Gerwick, W.H.; Proteau, P.J.; Ishmael, J.E.; et al. Depsipeptide companeramides from a Panamanian marine cyanobacterium associated with the coibamide producer. *J. Nat. Prod.* **2015**, *78*, 413-420, doi:10.1021/np5007907.
75. Stratmann, K.; Burgoyne, D.L.; Moore, R.E.; Patterson, G.M.L.; Smith, C.D. Hapalosin, a cyanobacterial cyclic depsipeptide with multidrug-resistance reversing activity.

*J. Org. Chem.* **2002**, *59*, 7219-7226, doi:10.1021/jo00103a011.

76. Kanamori, Y.; Iwasaki, A.; Sumimoto, S.; Suenaga, K. Urumamide, a novel chymotrypsin inhibitor with a  $\beta$ -amino acid from a marine cyanobacterium *Okeania* sp. *Tetrahedron Lett.* **2016**, *57*, 4213-4216, doi:10.1016/j.tetlet.2016.08.012.
77. Zampella, A.; D'Auria, M.V.; Paloma, L.G.; Casapullo, A.; Minale, L.; Debitus, C.; Henin, Y. Callipeltin A, an anti-HIV cyclic depsipeptide from the new caledonian lithistida sponge *Callipelta* sp. *J. Am. Chem. Soc.* **1996**, *118*, 6202-6209, doi:10.1021/ja954287p.
78. D'Auria, M.V.; Sepe, V.; D'Orsi, R.; Bellotta, F.; Debitus, C.; Zampella, A. Isolation and structural elucidation of callipeltins J–M: antifungal peptides from the marine sponge *Latrunculia* sp. *Tetrahedron* **2007**, *63*, 131-140, doi:10.1016/j.tet.2006.10.032.
79. Stierhof, M.; Hansen, K.Ø.; Sharma, M.; Feussner, K.; Subko, K.; Díaz-Rullo, F.F.; Isaksson, J.; Pérez-Victoria, I.; Clarke, D.; Hansen, E.; et al. New cytotoxic callipeltins from the Solomon Island marine sponge *Asteropus* sp. *Tetrahedron* **2016**, *72*, 6929-6934, doi:10.1016/j.tet.2016.09.016.
80. Clark, D.P.; Carroll, J.; Naylor, S.; Crews, P. An antifungal cyclodepsipeptide, Cyclolithistide A, from the sponge *Theonella swinhoei*. *J. Org. Chem.* **1998**, *63*, 8757-8764, doi:10.1021/jo980758p.
81. Urda, C.; Fernandez, R.; Rodriguez, J.; Perez, M.; Jimenez, C.; Cuevas, C. Daedophamide, a cytotoxic cyclodepsipeptide from a *Daedalopelta* sp. sponge collected in indonesia. *J. Nat. Prod.* **2017**, *80*, 3054-3059, doi:10.1021/acs.jnatprod.7b00678.
82. Zampella, A.; Sepe, V.; Luciano, P.; Bellotta, F.; Monti, M.C.; D'Auria, M.V.; Jepsen, T.; Petek, S.; Adeline, M.T.; Laprevote, O.; et al. Homophymine A, an anti-HIV cyclodepsipeptide from the sponge *Homophymia* sp. *J. Org. Chem.* **2008**, *73*, 5319-5327, doi:10.1021/jo800583b.
83. Zampella, A.; Sepe, V.; Bellotta, F.; Luciano, P.; D'Auria, M.V.; Cresteil, T.; Debitus, C.; Petek, S.; Poupat, C.; Ahond, A. Homophymines B-E and A1-E1, a family of bioactive cyclodepsipeptides from the sponge *Homophymia* sp. *Org. Biomol. Chem.* **2009**, *7*, 4037-4044, doi:10.1039/b910015f.
84. Rashid, M.A.; Gustafson, K.R.; Cartner, L.K.; Shigematsu, N.; Pannell, L.K.; Boyd, M.R. Microspinosamide, a new HIV-inhibitory cyclic depsipeptide from the marine sponge *Sidonops microspinosus*. *J. Nat. Prod.* **2001**, *64*, 117-121, doi:10.1021/np0002379.
85. Plaza, A.; Gustchina, E.; Baker, H.L.; Kelly, M.; Bewley, C.A. Mirabamides A-D, depsipeptides from the sponge *Siliquariaspongia mirabilis* that inhibit HIV-1 fusion. *J. Nat. Prod.* **2007**, *70*, 1753-1760, doi:10.1021/np070306k.
86. Lu, Z.; Van Wagoner, R.M.; Harper, M.K.; Baker, H.L.; Hooper, J.N.; Bewley, C.A.; Ireland, C.M. Mirabamides E-H, HIV-inhibitory depsipeptides from the sponge *Stelletta clavosa*. *J. Nat. Prod.* **2011**, *74*, 185-193, doi:10.1021/np100613p.
87. Okada, Y.; Matsunaga, S.; van Soest, R.W.; Fusetani, N. Nagahamide A, an antibacterial depsipeptide from the marine sponge *Theonella swinhoei*. *Org. Lett.* **2002**, *4*, 3039-3042, doi:10.1021/ol0262791.
88. Ford, P.W.; Gustafson, K.R.; McKee, T.C.; Shigematsu, N.; Maurizi, L.K.; Pannell, L.K.; Williams, D.E.; Dilip de Silva, E.; Lassota, P.; Allen, T.M.; et al. Papuamides A–D,

- HIV-inhibitory and cytotoxic depsipeptides from the sponges *Theonella mirabilis* and *Theonella swinhoei* collected in papua new guinea. *J. Am. Chem. Soc.* **1999**, *121*, 5899-5909, doi:10.1021/ja990582o.
89. Prasad, P.; Aalbersberg, W.; Feussner, K.D.; Van Wagoner, R.M. Papuamides E and F, cytotoxic depsipeptides from the marine sponge *Melophlus* sp. *Tetrahedron* **2011**, *67*, 8529-8531, doi:10.1016/j.tet.2011.08.100.
  90. Capon, R.J.; Ford, J.; Lacey, E.; Gill, J.H.; Heiland, K.; Friedel, T. Phoriospongins A and B: two new nematocidal depsipeptides from the Australian marine sponges *Phoriospongia* sp. and *Callyspongia bilamellata*. *J. Nat. Prod.* **2002**, *65*, 358-363, doi:10.1021/np010329d.
  91. Coello, L.; Reyes, F.; Martin, M.J.; Cuevas, C.; Fernandez, R. Isolation and structures of pipecolidepsins A and B, cytotoxic cyclic depsipeptides from the madagascan sponge *Homophymia lamellosa*. *J. Nat. Prod.* **2014**, *77*, 298-303, doi:10.1021/np400888e.
  92. Gulavita, N.K.; Gunasekera, S.P.; Pomponi, S.A.; Robinson, E.V. Polydiscamide A: a new bioactive depsipeptide from the marine sponge *Discodermia* sp. *J. Org. Chem.* **2002**, *57*, 1767-1772, doi:10.1021/jo00032a031.
  93. Feng, Y.; Carroll, A.R.; Pass, D.M.; Archbold, J.K.; Avery, V.M.; Quinn, R.J. Polydiscamides B-D from a marine sponge *Ircinia* sp. as potent human sensory neuron-specific G protein coupled receptor agonists. *J. Nat. Prod.* **2008**, *71*, 8-11, doi:10.1021/np070094r.
  94. Martin, M.J.; Rodriguez-Acebes, R.; Garcia-Ramos, Y.; Martinez, V.; Murcia, C.; Digon, I.; Marco, I.; Pelay-Gimeno, M.; Fernandez, R.; Reyes, F.; et al. Stellatolides, a new cyclodepsipeptide family from the sponge *Ecionemia acervus*: isolation, solid-phase total synthesis, and full structural assignment of stellatolide A. *J. Am. Chem. Soc.* **2014**, *136*, 6754-6762, doi:10.1021/ja502744a.
  95. Nakamukai, S.; Takada, K.; Furihata, K.; Ise, Y.; Okada, S.; Morii, Y.; Yamawaki, N.; Takatani, T.; Arakawa, O.; Gustafson, K.R.; et al. Stellatolide H, a cytotoxic peptide lactone from a deep-sea sponge *Discodermia* sp. *Tetrahedron Lett.* **2018**, *59*, 2532-2536, doi:10.1016/j.tetlet.2018.05.033.
  96. Shin, H.J.; Rashid, M.A.; Cartner, L.K.; Bokesch, H.R.; Wilson, J.A.; McMahon, J.B.; Gustafson, K.R. Stelletapeptins A and B, HIV-inhibitory cyclic depsipeptides from the marine sponge *Stelletta* sp. *Tetrahedron Lett.* **2015**, *56*, 4215-4219, doi:10.1016/j.tetlet.2015.05.058.
  97. Ratnayake, A.S.; Bugni, T.S.; Feng, X.; Harper, M.K.; Skalicky, J.J.; Mohammed, K.A.; Andjelic, C.D.; Barrows, L.R.; Ireland, C.M. Theopapuamide, a cyclic depsipeptide from a Papua New Guinea lithistid sponge *Theonella swinhoei*. *J. Nat. Prod.* **2006**, *69*, 1582-1586, doi:10.1021/np060229d.
  98. Suenaga, K.; Mutou, T.; Shibata, T.; Itoh, T.; Fujita, T.; Takada, N.; Hayamizu, K.; Takagi, M.; Irifune, T.; Kigoshi, H.; et al. Aurilide, a cytotoxic depsipeptide from the sea hare *Dolabella auricularia*: isolation, structure determination, synthesis, and biological activity. *Tetrahedron* **2004**, *60*, 8509-8527, doi:10.1016/j.tet.2004.06.125.
  99. Sone, H.; Nemoto, T.; Ishiwata, H.; Ojika, M.; Yamada, K. Isolation, structure, and synthesis of dolastatin D, a cytotoxic cyclic depsipeptide from the sea hare *dolabella abricularia*. *Tetrahedron Lett.* **1993**, *34*, 8449-8452, doi:10.1016/s0040-4039(00)61356-4.
  100. Sone, H.; Shibata, T.; Fujita, T.; Ojika, M.; Yamada, K. Dolastatin H and Isodolastatin H, potent cytotoxic peptides from the sea hare *Dolabella auricularia*: isolation,

- stereostructures, and synthesis. *J. Am. Chem. Soc.* **1996**, *118*, 1874-1880, doi:10.1021/ja9519086.
101. Mutou, T.; Kondo, T.; Ojika, M.; Yamada, K. Isolation and stereostructures of dolastatin G and nordolastatin G, cytotoxic 35-membered cyclodepsipeptides from the Japanese sea hare *Dolabella auricularia*. *J. Org. Chem.* **1996**, *61*, 6340-6345, doi:10.1021/jo9608228.
  102. Pettit, G.R.; Kamano, Y.; Herald, C.L.; Dufresne, C.; Bates, R.B.; Schmidt, J.M.; Cerny, R.L.; Kizu, H. Antineoplastic agents. 190. isolation and structure of the cyclodepsipeptide dolastatin 14. *J. Org. Chem.* **2002**, *55*, 2989-2990, doi:10.1021/jo00297a001.
  103. Hamann, M.T.; Otto, C.S.; Scheuer, P.J.; Dunbar, D.C. Kahalalides: bioactive peptides from a marine mollusk *Elysia rufescens* and its algal diet *Bryopsis* sp. *J. Org. Chem.* **1996**, *61*, 6594-6600, doi:10.1021/jo960877+.
  104. Hamann, M.T.; Scheuer, P.J. Kahalalide F: a bioactive depsipeptide from the sacoglossan mollusk *Elysia rufescens* and the green alga *Bryopsis* sp. *J. Am. Chem. Soc.* **1993**, *115*, 5825-5826, doi:10.1021/ja00066a061.
  105. Horgen, F.D.; delos Santos, D.B.; Goetz, G.; Sakamoto, B.; Kan, Y.; Nagai, H.; Scheuer, P.J. A new depsipeptide from the sacoglossan mollusk *Elysia ornata* and the green alga *Bryopsis* species. *J. Nat. Prod.* **2000**, *63*, 152-154, doi:10.1021/np990402o.
  106. Tilvi, S.; Naik, C.G. Tandem mass spectrometry of kahalalides: identification of two new cyclic depsipeptides, kahalalide R and S from *Elysia grandifolia*. *J. Mass. Spectrom.* **2007**, *42*, 70-80, doi:10.1002/jms.1140.
  107. Rao, K.V.; Na, M.K.; Cook, J.C.; Peng, J.; Matsumoto, R.; Hamann, M.T. Kahalalides V-Y isolated from a Hawaiian collection of the sacoglossan mollusk *Elysia rufescens*. *J. Nat. Prod.* **2008**, *71*, 772-778, doi:10.1021/np070508g.
  108. Ciavatta, M.L.; Devi, P.; Carbone, M.; Mathieu, V.; Kiss, R.; Casapullo, A.; Gavagnin, M. Kahalalide F analogues from the mucous secretion of Indian sacoglossan mollusc *Elysia ornata*. *Tetrahedron* **2016**, *72*, 625-631, doi:10.1016/j.tet.2015.12.003.
  109. Kimura, J.; Takada, Y.; Inayoshi, T.; Nakao, Y.; Goetz, G.; Yoshida, W.Y.; Scheuer, P.J. Kulokekahilide-1, a cytotoxic depsipeptide from the cephalaspidean mollusk *Philinopsis speciosa*. *J. Org. Chem.* **2002**, *67*, 1760-1767, doi:10.1021/jo010176z.
  110. Nakao, Y.; Yoshida, W.Y.; Takada, Y.; Kimura, J.; Yang, L.; Mooberry, S.L.; Scheuer, P.J. Kulokekahilide-2, a cytotoxic depsipeptide from a cephalaspidean mollusk *Philinopsis speciosa*. *J. Nat. Prod.* **2004**, *67*, 1332-1340, doi:10.1021/np049949f.
  111. Nakao, Y.; Yoshida, W.Y.; Szabo, C.M.; Baker, B.J.; Scheuer, P.J. More peptides and other diverse constituents of the marine mollusk *Philinopsis speciosa*. *J. Org. Chem.* **1998**, *63*, 3272-3280, doi:10.1021/jo9719867.
  112. Rodríguez, J.; Fernández, R.; Quiñoá, E.; Riguera, R.; Debitus, C.; Bouchet, P. Onchidin: a cytotoxic depsipeptide with C<sub>2</sub> symmetry from a marine mollusc. *Tetrahedron Lett.* **1994**, *35*, 9239-9242, doi:10.1016/0040-4039(94)88477-3.
  113. Fernández, R.; Rodríguez, J.; Quiñoá, E.; Riguera, R.; Muñoz, L.; Fernández-Suárez, M.; Debitus, C. Onchidin B: a new cyclodepsipeptide from the mollusc *Onchidium*

- sp. *J. Am. Chem. Soc.* **1996**, *118*, 11635-11643, doi:10.1021/ja961314i.
114. Nakao, Y.; Yoshida, W.Y.; Scheuer, P.J. Pupukeamide, a linear tetrapeptide from a cephalaspidean mollusk *Philinopsis speciosa*. *Tetrahedron Lett.* **1996**, *37*, 8993-8996, doi:10.1016/s0040-4039(96)02111-9.
  115. Kim, M.Y.; Sohn, J.H.; Ahn, J.S.; Oh, H. Alternaramide, a cyclic depsipeptide from the marine-derived fungus *Alternaria* sp. SF-5016. *J. Nat. Prod.* **2009**, *72*, 2065-2068, doi:10.1021/np900464p.
  116. Lin, Y.; Wang, J.; Wu, X.; Zhou, S.; Vrijmoed, L.L.P.; Jones, E.B.G. A novel compound Enniatin G from the mangrove fungus *Halosarpheia* sp. (strain #732) from the south China sea. *Aust. J. Chem.* **2002**, *55*, 225-227, doi:10.1071/ch01164.
  117. Zhu, X.; Zhong, Y.; Xie, Z.; Wu, M.; Hu, Z.; Ding, W.; Li, C. Fusarihexins A and B: novel cyclic hexadepsipeptides from the mangrove endophytic fungus *Fusarium* sp. R5 with antifungal activities. *Planta. Med.* **2018**, *84*, 1355-1362, doi:10.1055/a-0647-7048.
  118. Amagata, T.; Morinaka, B.I.; Amagata, A.; Tenney, K.; Valeriote, F.A.; Lobkovsky, E.; Clardy, J.; Crews, P. A chemical study of cyclic depsipeptides produced by a sponge-derived fungus. *J. Nat. Prod.* **2006**, *69*, 1560-1565, doi:10.1021/np060178k.
  119. Feng, Y.; Blunt, J.W.; Cole, A.L.; Munro, M.H. A novel cyclodepsipeptide, HA23, from a *Fusarium* sp. *Org. Lett.* **2002**, *4*, 2095-2096, doi:10.1021/ol0260167.
  120. Kawahara, T.; Takagi, M.; Shin-Ya, K. Three new depsipeptides, JBIR-113, JBIR-114 and JBIR-115, isolated from a marine sponge-derived *Penicillium* sp. fS36. *J. Antibiot.* **2012**, *65*, 147-150, doi:10.1038/ja.2011.126.
  121. Belofsky, G.N.; Jensen, P.R.; Fenical, W. Sansalvamide: A new cytotoxic cyclic depsipeptide produced by a marine fungus of the genus *Fusarium*. *Tetrahedron Lett.* **1999**, *40*, 2913-2916, doi:10.1016/s0040-4039(99)00393-7.
  122. Nihei, K.; Itoh, H.; Hashimoto, K.; Miyairi, K.; Okuno, T. Antifungal cyclodepsipeptides, W493 A and B, from *Fusarium* sp.: isolation and structural determination. *Biosci. Biotechnol. Biochem.* **1998**, *62*, 858-863, doi:10.1271/bbb.62.858.
  123. Lv, F.; Daletos, G.; Lin, W.; Proksch, P. Two new cyclic depsipeptides from the endophytic fungus *Fusarium* sp. *Nat. Prod. Commun.* **2015**, *10*, 1667-1670.
  124. Oh, D.-C.; Jensen, P.R.; Fenical, W. Zygosporamide, a cytotoxic cyclic depsipeptide from the marine-derived fungus *Zygosporium masonii*. *Tetrahedron Lett.* **2006**, *47*, 8625-8628, doi:10.1016/j.tetlet.2006.08.113.
  125. Zhou, Z.; Wang, X.; Zhang, H.; Sun, J.; Zheng, L.; Liu, H.; Wang, J.; Shen, A.; Geng, M.; Guo, Y. Chromopeptide A, a highly cytotoxic depsipeptide from the marine sediment-derived bacterium *Chromobacterium* sp. HS-13-94. *Acta. Pharm Sin B* **2015**, *5*, 62-66, doi:10.1016/j.apsb.2014.11.001.
  126. Hu, J.-F.; Wunderlich, D.; Sattler, I.; Feng, X.-Z.; Grabley, S.; Thiericke, R. Rakicidin C, A new cyclic depsipeptide from *Streptomyces* sp. *Eur. J. Org. Chem* **2000**, *2000*, 3353-3356, doi:10.1002/1099-0690(200010)2000:19<3353::Aid-ejoc3353>3.0.Co;2-e.
  127. Igarashi, Y.; Shimasaki, R.; Miyanaga, S.; Oku, N.; Onaka, H.; Sakurai, H.; Saiki, I.; Kitani, S.; Nihira, T.; Wimonravude, W.; et al. Rakicidin D, an inhibitor of tumor cell

- invasion from marine-derived *Streptomyces* sp. *J. Antibiot.* **2010**, *63*, 563-565, doi:10.1038/ja.2010.70.
128. Kitani, S.; Ueguchi, T.; Igarashi, Y.; Leetanasaksakul, K.; Thamchaipenet, A.; Nihira, T. Rakacidin F, a new antibacterial cyclic depsipeptide from a marine sponge-derived *Streptomyces* sp. *J. Antibiot.* **2017**, 1-3, doi:10.1038/ja.2017.92.
  129. Chen, L.; Zhao, W.; Jiang, H.-L.; Zhou, J.; Chen, X.-M.; Lian, Y.-Y.; Jiang, H.; Lin, F. Rakicidins G - I, cyclic depsipeptides from marine *Micromonospora chalcea* FIM 02-523. *Tetrahedron* **2018**, *74*, 4151-4154, doi:10.1016/j.tet.2018.06.039.
  130. Trischman, J.A.; Tapiolas, D.M.; Jensen, P.R.; Dwight, R.; Fenical, W.; McKee, T.C.; Ireland, C.M.; Stout, T.J.; Clardy, J. Salinamides A and B: anti-inflammatory depsipeptides from a marine *streptomyces*. *J. Am. Chem. Soc.* **2002**, *116*, 757-758, doi:10.1021/ja00081a042.
  131. Hassan, H.M.; Degen, D.; Jang, K.H.; Ebright, R.H.; Fenical, W. Salinamide F, new depsipeptide antibiotic and inhibitor of bacterial RNA polymerase from a marine-derived *Streptomyces* sp. *J. Antibiot.* **2015**, *68*, 206-209, doi:10.1038/ja.2014.122.
  132. Machida, K.; Arai, D.; Katsumata, R.; Otsuka, S.; Yamashita, J.K.; Ye, T.; Tang, S.; Fusetani, N.; Nakao, Y. Sameuramide A, a new cyclic depsipeptide isolated from an ascidian of the family Didemnidae. *Bioorgan. Med. Chem.* **2018**, *26*, 3852-3857, doi:10.1016/j.bmc.2018.06.042.
  133. Kodani, S.; Komaki, H.; Hemmi, H.; Miyake, Y.; Kaweewan, I.; Dohra, H. Streptopeptolin, a cyanopeptolin-type peptide from *Streptomyces olivochromogenes*. *ACS. Omega*. **2018**, *3*, 8104-8110, doi:10.1021/acsomega.8b01042.
  134. Tiwari, A.; Kaweewan, I.; Miyake, Y.; Hemmi, H.; Kodani, S. Isolation and structure determination of new chymotrypsin inhibitory peptides streptopeptolins B and C. *Nat. Prod. Res.* **2021**, *35*, 2700-2706, doi:10.1080/14786419.2019.1663514.
  135. Romero, F.; Espliego, F.; Perez Baz, J.; Garcia de Quesada, T.; Gravalos, D.; de la Calle, F.; Fernandez-Puentes, J.L. Thiocoraline, a new depsipeptide with antitumor activity produced by a marine *Micromonospora*. I. Taxonomy, fermentation, isolation, and biological activities. *J. Antibiot.* **1997**, *50*, 734-737, doi:10.7164/antibiotics.50.734.
  136. Wyche, T.P.; Hou, Y.; Braun, D.; Cohen, H.C.; Xiong, M.P.; Bugni, T.S. First natural analogs of the cytotoxic thiodepsipeptide thiocoraline A from a marine *Verrucosipora* sp. *J. Org. Chem.* **2011**, *76*, 6542-6547, doi:10.1021/jo200661n.
  137. Oku, N.; Kawabata, K.; Adachi, K.; Katsuta, A.; Shizuri, Y. Unnarmicins A and C, new antibacterial depsipeptides produced by marine bacterium *Photobacterium* sp. MBIC06485. *J. Antibiot.* **2008**, *61*, 11-17, doi:10.1038/ja.2008.103.
  138. Nair, V.; Kim, M.C.; Golen, J.A.; Rheingold, A.L.; Castro, G.A.; Jensen, P.R.; Fenical, W. Verrucosamide, a cytotoxic 1,4-thiazepane-containing thiodepsipeptide from a marine-derived *Actinomycete*. *Mar. Drugs* **2020**, *18*, 549, doi:10.3390/md18110549.
  139. Kan, Y.; Fujita, T.; Sakamoto, B.; Hokama, Y.; Nagai, H. Kahalalide K: A new cyclic depsipeptide from the hawaiian green alga *bryopsis* species. *J. Nat. Prod.* **1999**, *62*, 1169-1172, doi:10.1021/np990053y.



140. Dmitrenok, A.; Iwashita, T.; Nakajima, T.; Sakamoto, B.; Namikoshi, M.; Nagai, H. New cyclic depsipeptides from the green alga *Bryopsis* species; application of a carboxypeptidase hydrolysis reaction to the structure determination. *Tetrahedron* **2006**, *62*, 1301-1308, doi:10.1016/j.tet.2005.10.079.
141. Iwasaki, A.; Ohno, O.; Sumimoto, S.; Matsubara, T.; Shimada, S.; Sato, T.; Suenaga, K. Mebamamides A and B, cyclic lipopeptides isolated from the Green Alga *Derbesia marina*. *J. Nat. Prod.* **2015**, *78*, 901-908, doi:10.1021/acs.jnatprod.5b00168.
142. Li, Y.; Yu, H.B.; Zhang, Y.; Leao, T.; Glukhov, E.; Pierce, M.L.; Zhang, C.; Kim, H.; Mao, H.H.; Fang, F.; et al. Pagoamide A, a cyclic depsipeptide Isolated from a cultured marine chlorophyte, *Derbesia* sp., using MS/MS-based molecular networking. *J. Nat. Prod.* **2020**, *83*, 617-625, doi:10.1021/acs.jnatprod.9b01019.
